# Supplementary material
Source: PubMed Central journal article supplement (PMC7337356)
Supplement: NIHMS1594969-supplement-1.pdf [file NIHMS1594969-supplement-1.pdf]

**ONLINE APPENDIX****Contents**

|                                                                                                                                                   |        |
|---------------------------------------------------------------------------------------------------------------------------------------------------|--------|
| <b>Online Table 1.</b> Frequency of IHD diagnoses in the study cohort.                                                                            | Page 2 |
| <b>Online Table 2.</b> Interactions between women's pregnancy duration and preeclampsia in relation to IHD risk with up to 43 years of follow-up. | Page 3 |
| <b>Online Table 3.</b> Interactions between women's pregnancy duration and fetal growth in relation to IHD risk with up to 43 years of follow-up. | Page 4 |

**Online Table 1.** Frequency of IHD diagnoses in the study cohort.

| <b>Diagnosis</b>            | <b>ICD-8/9</b> | <b>ICD-10</b> | <b>n (%)</b>   |
|-----------------------------|----------------|---------------|----------------|
| Acute myocardial infarction | 410            | I21-I23       | 27,625 (55.3)  |
| Angina pectoris             | 413            | I-20          | 19,332 (38.7)  |
| Other acute IHD             | 411            | I-24          | 400 (0.8)      |
| Other chronic IHD           | 412, 414       | I-25          | 2,598 (5.2)    |
| Total                       | 410-414        | I20-I25       | 49,955 (100.0) |

*ICD = International Classification of Diseases, IHD = ischemic heart disease*

Journal Pre-proof

**Online Table 2.** Interactions between women's pregnancy duration and preeclampsia in relation to IHD risk with up to 43 years of follow-up.

|                                                                | <b>Pregnancy duration</b>    |                                       |                                    |                                       |                                    |                                       | HRs (95% CI) for early term vs. full-term within preeclampsia strata | HRs (95% CI) for preterm vs. full-term within preeclampsia strata |
|----------------------------------------------------------------|------------------------------|---------------------------------------|------------------------------------|---------------------------------------|------------------------------------|---------------------------------------|----------------------------------------------------------------------|-------------------------------------------------------------------|
|                                                                | Full-term (39-41 wks)        |                                       | Early term (37-38 wks)             |                                       | Preterm (<37 wks)                  |                                       |                                                                      |                                                                   |
|                                                                | Rate <sup>a</sup><br>(Cases) | HR (95% CI) <sup>b</sup>              | Rate <sup>a</sup><br>(Cases)       | HR (95% CI) <sup>b</sup>              | Rate <sup>a</sup><br>(Cases)       | HR (95% CI) <sup>b</sup>              |                                                                      |                                                                   |
| <b>Preeclampsia</b>                                            |                              |                                       |                                    |                                       |                                    |                                       |                                                                      |                                                                   |
| No                                                             | 89.7<br>(26,039)             | Reference                             | 106.3<br>(11,306)                  | 1.23 (1.21, 1.26);<br><i>P</i> <0.001 | 142.7<br>(5,204)                   | 1.52 (1.47, 1.57);<br><i>P</i> <0.001 | 1.23 (1.21, 1.26);<br><i>P</i> <0.001                                | 1.52 (1.47, 1.57);<br><i>P</i> <0.001                             |
| Yes                                                            | 208.4<br>(2,491)             | 1.51 (1.45, 1.57);<br><i>P</i> <0.001 | 249.3<br>(1,315)                   | 1.94 (1.84, 2.05);<br><i>P</i> <0.001 | 260.1<br>(874)                     | 2.46 (2.30, 2.63);<br><i>P</i> <0.001 | 1.29 (1.20, 1.37);<br><i>P</i> <0.001                                | 1.63 (1.50, 1.76);<br><i>P</i> <0.001                             |
| HRs (95% CI) for preeclampsia within pregnancy duration strata |                              | 1.51 (1.45, 1.57);<br><i>P</i> <0.001 |                                    | 1.57 (1.48, 1.67);<br><i>P</i> <0.001 |                                    | 1.62 (1.50, 1.73);<br><i>P</i> <0.001 |                                                                      |                                                                   |
| Interaction on additive scale: RERI (95% CI)                   |                              |                                       | 0.20 (0.08, 0.32); <i>P</i> =0.001 |                                       | 0.43 (0.25, 0.61); <i>P</i> <0.001 |                                       |                                                                      |                                                                   |
| Interaction on multiplicative scale: HR ratio (95% CI)         |                              |                                       | 1.04 (0.97, 1.12); <i>P</i> =0.24  |                                       | 1.07 (0.98, 1.16); <i>P</i> =0.11  |                                       |                                                                      |                                                                   |

<sup>a</sup>IHD incidence rate per 100,000 person-years.

<sup>b</sup>Adjusted for maternal age, year of delivery, parity, education, employment, income, region of origin, BMI, smoking, other hypertensive disorders, and diabetes prior to delivery.

HR = hazard ratio, RERI = relative excess risk due to interaction

**Online Table 3.** Interactions between women's pregnancy duration and fetal growth in relation to IHD risk with up to 43 years of follow-up.

|                                                               | Pregnancy duration           |                                       |                                    |                                       |                                    |                                       | HRs (95% CI) for early term vs. full-term within fetal growth strata | HRs (95% CI) for preterm vs. full-term within fetal growth strata |
|---------------------------------------------------------------|------------------------------|---------------------------------------|------------------------------------|---------------------------------------|------------------------------------|---------------------------------------|----------------------------------------------------------------------|-------------------------------------------------------------------|
|                                                               | Full-term (39-41 wks)        |                                       | Early term (37-38 wks)             |                                       | Preterm (<37 wks)                  |                                       |                                                                      |                                                                   |
|                                                               | Rate <sup>a</sup><br>(Cases) | HR (95% CI) <sup>b</sup>              | Rate <sup>a</sup><br>(Cases)       | HR (95% CI) <sup>b</sup>              | Rate <sup>a</sup><br>(Cases)       | HR (95% CI) <sup>b</sup>              |                                                                      |                                                                   |
| <b>Fetal growth</b>                                           |                              |                                       |                                    |                                       |                                    |                                       |                                                                      |                                                                   |
| AGA                                                           | 91.0<br>(21,333)             | Reference                             | 107.9<br>(9,297)                   | 1.24 (1.21, 1.27);<br><i>P</i> <0.001 | 143.8<br>(4,531)                   | 1.53 (1.48, 1.58);<br><i>P</i> <0.001 | 1.24 (1.21, 1.27);<br><i>P</i> <0.001                                | 1.53 (1.48, 1.58);<br><i>P</i> <0.001                             |
| SGA                                                           | 142.1<br>(3,109)             | 1.39 (1.34, 1.44);<br><i>P</i> <0.001 | 176.1<br>(1,064)                   | 1.72 (1.62, 1.83);<br><i>P</i> <0.001 | 228.1<br>(714)                     | 1.94 (1.80, 2.09);<br><i>P</i> <0.001 | 1.24 (1.15, 1.33);<br><i>P</i> <0.001                                | 1.39 (1.28, 1.51);<br><i>P</i> <0.001                             |
| HRs (95% CI) for SGA vs. AGA within pregnancy duration strata |                              | 1.39 (1.34, 1.44);<br><i>P</i> <0.001 |                                    | 1.39 (1.30, 1.48);<br><i>P</i> <0.001 |                                    | 1.27 (1.17, 1.37);<br><i>P</i> <0.001 |                                                                      |                                                                   |
| Interaction on additive scale: RERI (95% CI)                  |                              |                                       | 0.09 (-0.03, 0.21); <i>P</i> =0.12 |                                       | 0.02 (-0.14, 0.18); <i>P</i> =0.80 |                                       |                                                                      |                                                                   |
| Interaction on multiplicative scale: HR ratio (95% CI)        |                              |                                       | 1.00 (0.93, 1.07); <i>P</i> =0.99  |                                       | 0.91 (0.83, 0.99); <i>P</i> =0.03  |                                       |                                                                      |                                                                   |

<sup>a</sup>IHD incidence rate per 100,000 person-years.

<sup>b</sup>Adjusted for maternal age, year of delivery, parity, education, employment, income, region of origin, BMI, smoking, preeclampsia, other hypertensive disorders, and diabetes prior to delivery.

AGA = appropriate for gestational age, HR = hazard ratio, RERI = relative excess risk due to interaction, SGA = small for gestational age
